# Supplementary material
Source: PubMed Central journal article supplement (PMC4248956)
Supplement: JVI.01673-14_zjv999099774so1.pdf [file JVI.01673-14_zjv999099774so1.pdf]

## Supplemental Material: Section 1: Detailed ORF Coordinates Data for Individual EEHV PCR Loci:

Table S1: Details of PCR Sequenced EEHV1A, EEHV1B and EEHV2 Gene Coding Regions:

| Virus No.<br>Gene/ORF                                                                                                                                           | HCMV<br>ORF | HSV Ori-<br>ORF ent | Protein<br>Name | Position No | Gene<br>Size | Protein<br>Size | Genbank<br>Acc # | Status | Kimba<br>Coordinates | Diff<br>% |
|-----------------------------------------------------------------------------------------------------------------------------------------------------------------|-------------|---------------------|-----------------|-------------|--------------|-----------------|------------------|--------|----------------------|-----------|
| <u>1.EEHV1A [#NAP18, Kala]: Sixteen segments, ORF-C to A (5x), oriLyt, MDBP, gB-POL, U33, TEG-L, TRI1 to U58, TERex1,2, TERex3, OBP, POR-HEL, HEL to ORF-L.</u> |             |                     |                 |             |              |                 |                  |        |                      |           |
| Total = 65,737-bp Differences = 1,125-bp = 1.7%                                                                                                                 |             |                     |                 |             |              |                 |                  |        |                      |           |
| ORF-CNterm                                                                                                                                                      | Nil         | Nil                 | F               | 00001-00925 | (925)        | (308)           | HM568517         | Novel  | 051273-052229        | 6.5       |
| ORF-CCterm                                                                                                                                                      | Nil         | Nil                 | F               | 00001-00934 | (934)        | (311)           | HM568516         | -      | 053368-054301        | 0.2       |
| U4                                                                                                                                                              | Nil         | Nil                 | F               | 00001-00811 | (811)        | (270)           | HM568518         | β      | 055563-056373        | 0.25      |
| U5/ORF-B                                                                                                                                                        | Nil         | Nil                 | F               | 00001-01088 | (1088)       | (383)           | HM568519         | β      | 057008-058095        | 0.6       |
| ORF-A                                                                                                                                                           | Nil         | Nil                 | F               | 00001-00966 | (966)        | (322)           | HM568520         | Novel  | 059339-060304        | 0.2       |
| U42                                                                                                                                                             | UL69        | UL54                | F MTA           | 00001-00069 | (69)         | (22)            | HM568521         | Core   | 067831-068471        | 0.3       |
| Intergenic                                                                                                                                                      | Nil         | Ori-Lyt             | Ori-Lyt         | 00155-00346 | 192          | NC              |                  |        |                      |           |
| U41                                                                                                                                                             | UL57        | UL29                | F MDB           | 00618-00641 | (24)         | (8)             |                  | -      |                      |           |
| U41                                                                                                                                                             | UL57        | UL29                | F MDB           | 00001-01953 | (1953)       | (750)           | HM568522         | Core   | 069421-071373        | 0.25      |
| -                                                                                                                                                               | -           |                     |                 | 00001-00024 | (24)         | NC              | HM568523         | -      | 073935-079679        | 1.5       |
| U39                                                                                                                                                             | UL55        | UL27                | F gB            | 00025-02577 | 2553         | 850             |                  | Core   |                      |           |
| U38                                                                                                                                                             | UL54        | UL30                | F POL           | 02610-05753 | 3144         | 1047            |                  | Core   |                      |           |
| -                                                                                                                                                               | -           |                     |                 | 05754-05947 | (197)        | NC              |                  | -      |                      |           |
| U33                                                                                                                                                             | UL49        | Nil                 | F Cys-rich      | 00001-00907 | (907)        | (269)           | JN983079         | β/γ    | 083537-084444        | 1.0       |
| U31                                                                                                                                                             | UL48        | UL36                | R TEG-L         | 00944-00001 | (944)        | (315)           | JN983080         | Core   | 086587-087530        | 3.8       |
| U29                                                                                                                                                             | UL46        | UL38                | F TRI1          | 00001-00664 | (664)        | (221)           | HM568525         | Core   | 096648-120177        | 0.9       |
| U28                                                                                                                                                             | UL45        | UL39                | F RRA           | 00711-03113 | 2402         | 801             |                  | Core   |                      |           |
| U27.5/ORF-H                                                                                                                                                     | Nil         | UL40                | F RRB           | 03157-04062 | 905          | 302             |                  | α/γ    |                      |           |
| U27/ORF-I                                                                                                                                                       | UL44        | UL42                | F PPF           | 04313-05539 | 1226         | 409             |                  | Core   |                      |           |
| U45.7/ORF-J                                                                                                                                                     | Nil         | Nil                 | F               | 05622-06128 | 507          | 168             |                  | Novel  |                      |           |
| U46                                                                                                                                                             | UL73        | UL49A               | F gN            | 06112-06402 | 291          | 96              |                  | Core   |                      |           |
| U47/ORF-D                                                                                                                                                       | UL74        | Nil                 | R gO            | 07066-06428 | 639          | 212             |                  | β      |                      |           |
| U48                                                                                                                                                             | UL75        | UL22                | R gH            | 09264-07045 | 2220         | 739             |                  | Core   |                      |           |
| U48.5/ORF-E                                                                                                                                                     | Nil         | UL23                | R TK            | 10261-09188 | 1074         | 357             |                  | α/γ    |                      |           |
| U49                                                                                                                                                             | UL76        | UL24                | F               | 10263-10961 | 699          | 232             |                  | Core   |                      |           |
| U50                                                                                                                                                             | UL77        | UL25                | F PAC2          | 10780-12516 | 1736         | 578             |                  | Core   |                      |           |
| U51                                                                                                                                                             | UL78        | Nil                 | F vGPCR1        | 12523-13653 | 1131         | 376             |                  | β      |                      |           |
| U52                                                                                                                                                             | UL79        | Nil                 | R               | 14606-13770 | 837          | 278             |                  | β/γ    |                      |           |
| U53                                                                                                                                                             | UL80        | UL26                | F SCA/PRO       | 14407-16104 | 1698         | 565             |                  | Core   |                      |           |
| U54.5/ORF-F1                                                                                                                                                    | UL82-84     | Nil                 | R               | 17652-16210 | 1443         | 480             |                  | Novel  |                      |           |
| U56                                                                                                                                                             | UL85        | UL18                | R TRI2          | 18721-17843 | 879          | 292             |                  | Core   |                      |           |
| U57                                                                                                                                                             | UL86        | UL19                | R MCP           | 22809-18760 | 4050         | 1349            |                  | Core   |                      |           |
| U58                                                                                                                                                             | UL87        | (UL20)              | F               | 22971-23530 | (560)        | (187)           |                  | β/γ    |                      |           |
| U60ex3                                                                                                                                                          | UL89ex2     | UL15ex2             | R TERex3        | 00571-00001 | (571)        | (190)           | HM568526         | Core   | 123613-125266        | 0.24      |
| U62                                                                                                                                                             | UL91        | Nil                 |                 | 00598-00864 | 267          | 88              |                  | β/γ    |                      |           |
| U63                                                                                                                                                             | UL92        | Nil                 | F               | 00812-01405 | 594          | 197             |                  | β/γ    |                      |           |
| U64                                                                                                                                                             | UL93        | UL17                | F PAC1          | 01386-01653 | (272)        | (90)            |                  | Core   |                      |           |
| -                                                                                                                                                               | -           | -                   |                 | 00001-00024 | NC           | NC              | HM568527         | -      | 127324-127707        | 0.26      |

|                 |         |         |   |          |             |        |       |          |       |                    |
|-----------------|---------|---------|---|----------|-------------|--------|-------|----------|-------|--------------------|
| U66ex2          | Nil     | Nil     | R | TERex2   | 00144-00013 | 132    | 48    | -        |       |                    |
| U66ex1          | UL89ex1 | UL15ex1 | R | TERex1   | 00384-00229 | (155)  | (52)  | -        |       |                    |
| U70             | UL98    | UL12    | F | EXO      | 00001-00043 | (43)   | (12)  | HM568528 | Core  | 132976-135414 0.8  |
| U71             | UL99    | UL11    | F | myrTeg   | 00001-00267 | (267)  | (89)  |          | Core  |                    |
| U72             | UL100   | UL10    | R | gM       | 01421-00339 | 1182   | 394   |          | Core  |                    |
| U73/ORF-G       | Nil     | UL09    | F | OBP      | 01420-02431 | (1011) | (337) |          | A/B2  |                    |
| U75             | UL103   | UL07    | R | tegument | 00251-00001 | (251)  | (83)  | HM568529 | Core  | 139331-142081 0.36 |
| U76             | UL104   | UL06    | R | POR      | 01965-00160 | 1806   | 601   |          | Core  |                    |
| U77             | UL105   | UL05    | F | HEL      | 01916-02751 | (836)  | (278) |          | Core  |                    |
| U77             | UL105   | UL05    | F | HEL      | 00001-00042 | (42)   | (14)  | JX011080 | Core  | 143625-158993 ??   |
| U77.5/ORF-M     | Nil     | Nil     | F | Nuclear  | 00363-01874 | 1512   | 503   |          | Novel |                    |
| U80.5/ORF-N     | Nil     | Nil     | R | vCXCL1   | 02336-02016 | 321    | 106   |          | Novel |                    |
| U81             | UL114   | UL02    | R | UDG      | 03358-02405 | 954    | 317   |          | Core  |                    |
| U82             | UL115   | UL01    | R | gL       | 04238-03324 | 915    | 304   |          | Core  |                    |
| U82.5/ORF-Oex3  | Nil     | Nil     | R | S/TGlyP  | 04623-04078 | (546)  | (181) |          | Novel |                    |
| U82.5/ORF-Oex2  | Nil     | Nil     | R | S/TGlyP  | 04956-04709 | (248)  | (83)  |          | Novel |                    |
| U82.5/ORF-Oex1  | Nil     | Nil     | R | S/TGlyP  | 05384-05042 | (342)  | (114) |          | Novel |                    |
| U83.5/ORF-Pex2  | Nil     | Nil     | R | S/TGlyP  | 06732-05381 | (1351) | (447) |          | Novel |                    |
| U83.5/ORF-Pex1  | Nil     | Nil     | R | S/TGlyP  | 07061-06809 | (252)  | (83)  |          | Novel |                    |
| U84.5/ORF-Qex2  | Nil     | Nil     | R | S/TGlyP  | 07943-07163 | (780)  | (259) |          | Novel |                    |
| U84.5/ORF-Qex1  | Nil     | Nil     | R | S/TGlyP  | 08240-08027 | (213)  | (71)  |          | Novel |                    |
| U85.5/ORF-Kex3  | Nil     | Nil     | R | SplGlyP  | 10546-08385 | (2163) | (720) |          | Novel |                    |
| U85.5/ORF-Kex2  | Nil     | Nil     | R | SplGlyP  | 10665-10627 | (39)   | (13)  |          | Novel |                    |
| U85.5/ORF-Kex1A | Nil     | Nil     | R | SplGlyP  | 10713-10736 | (24)   | (8)   |          | Novel |                    |
| U86.5/ORF-L     | Nil     | Nil     | R | IE-like  | 15341-11475 | 3936   | 1311  |          | Novel |                    |
| -               | -       | -       | - | -        | 15342-15418 | (8)    | -     |          |       |                    |

2. EEHV1A [#NAP11,Kumari]: Ten segments, ORF-C(2x), MDBP, gB-POL, U33, TEG-L, TRI1 to vGPCR, MCP, U58-HEL, HEL to ORF-L. Total = 70,563-bp Differences = 874-bp =1.2%

|             |      |       |   |          |             |         |        |          |       |                   |
|-------------|------|-------|---|----------|-------------|---------|--------|----------|-------|-------------------|
| ORF-CNterm  | Nil  | Nil   | F |          | 00001-00927 | (927)   | (309)  | HM568508 | Novel | 051279-052232 2.7 |
| ORF-CCterm  | Nil  | Nil   | F |          | 00001-00926 | (926)   | (309)  | HM568507 | -     | 053370-054297 2.6 |
| U41         | UL57 | UL29  | F | MDBP     | 00001-01948 | (1948)  | (749)  | HM568509 | Core  | 069422-071369 0.2 |
| -           | -    | -     | - | -        | 00001-00024 | (24)    | NC     | HM568510 | -     | 073935-079875 1.2 |
| U39         | UL55 | UL27  | F | gB       | 00025-02568 | 2544    | 847    |          | Core  |                   |
| U38         | UL54 | UL30  | F | POL      | 02598-05741 | 3144    | 1047   |          | Core  |                   |
| -           | -    | -     | - | -        | 05742-05933 | (199)   | NC     |          | -     |                   |
| U33         | UL49 | Nil   | F | Cys-rich | 00001-00901 | (901)   | (300)  | JN983082 | β/γ   | 083528-084428 1.2 |
| U31         | UL48 | UL36  | R | TEG-L    | 00001-00948 | (948)   | (316)  | JN983083 | Core  | 086641-087528 3.8 |
| U29         | UL46 | UL38  | F | TRI1     | 00001-00663 | (663)   | (221)  | HM568513 | Core  | 096649-110246 0.9 |
| U28         | UL45 | UL39  | F | RRA      | 00710-03112 | 2402    | 801    |          | Core  |                   |
| U27.5/ORF-H | Nil  | UL40  | F | RRB      | 03156-04061 | 906     | 301    |          | α/γ   |                   |
| U27/ORF-I   | UL44 | UL42  | F | PPF      | 04312-05538 | 1227    | 409    |          | Core  |                   |
| U45.7/ORF-J | Nil  | Nil   | F |          | 05621-06127 | 507     | 168    |          | Novel |                   |
| U46         | UL73 | UL49A | F | gN       | 06111-06401 | 247     | 82     |          | Core  |                   |
| U47         | UL74 | Nil   | R | gO       | 07065-06427 | 639     | 213    |          | β     |                   |
| U48         | UL75 | UL22  | R | gH       | 09263-07044 | 2220    | 739    |          | Core  |                   |
| U48.5/ORF-E | Nil  | UL23  | R | TK       | 10260-09187 | 1073    | 358    |          | A/G   |                   |
| U49         | UL76 | UL24  | F |          | 10262-10960 | 699     | 232    |          | Core  |                   |
| U50         | UL77 | UL25  | F | PAC2     | 10779-12515 | 1735    | 578    |          | Core  |                   |
| U51         | UL78 | Nil   | F | vGPCR1   | 12522-13607 | (10860) | (362)  |          | β     |                   |
| U57         | UL86 | UL19  | R | MCP      | 03855-00001 | (3855)  | (1285) | HM568514 | Core  | 115602-119686 0.5 |
| U58         | UL87 | Nil   | F | capsid   | 04019-04087 | (68)    | (23)   |          | β/γ   |                   |
| U58         | UL87 | Nil   | F |          | 00001-02152 | (2152)  | (716)  | HM568515 | -     | 119857-142107 0.7 |



|                |       |      |   |         |             |        |       |          |                  |               |     |
|----------------|-------|------|---|---------|-------------|--------|-------|----------|------------------|---------------|-----|
| U73/ORF-G      | Nil   | UL09 | F | OBP     | 00001-00486 | (486)  | (162) | KM087790 | $\alpha/\beta$ 2 | 134586-135071 | 0.6 |
| U76            | UL104 | UL06 | R | POR     | 00381-00001 | (381)  | (127) | KM087791 | Core             | 140915-141865 | 0.1 |
| U77            | UL105 | UL05 | F | HEL     | 00332-00951 | (620)  | (207) |          | Core             |               |     |
| U77.5/ORF-M    | Nil   | Nil  | F |         | 00001-00701 | (939)  | (312) | KM087792 | Novel            | 144805-145740 | 1.3 |
| -              | -     | -    | - | -       | 00702-00939 | (238)  | NC    |          | -                |               |     |
| U81            | UL114 | UL02 | R | UDG     | 00452-00001 | (452)  | (151) | KM087793 | Core             | 146526-147085 | 2.7 |
| U82            | UL115 | UL01 | R | gL      | 00557-00418 | (140)  | (46)  |          | Core             |               |     |
| U85.5/ORF-Kex3 | Nil   | Nil  | R | SplGlyP | 02094-00001 | (2094) | (698) | KC854711 | Novel            | 152047-159070 | 1.0 |
| U85.5/ORF-Kex2 | Nil   | Nil  | R | SplGlyP | 02212-02173 | (39)   | (13)  |          | Novel            |               |     |
| U85.5/ORF-Kex1 | Nil   | Nil  | R | SplGlyP | 02282-02259 | (23)   | (8)   |          | Novel            |               |     |
| U86.5/ORF-L    | Nil   | Nil  | R | IE-like | 06946-03024 | 3923   | 1307  |          | Novel            |               |     |
| -              | -     | -    | - | -       | 06947-07040 | (94)   | NC    |          | -                |               |     |

4. EEHV1B [#NAP14,Kiba-B]: Sixteen segments ORF-C to -A (5x), MDBP, gB-POL, U33, TEG-L, TRI1 to vGPCR, MCP, TERex3, TERex1,2, EXO-OBP, POR-HEL, HEL to ORF-L.

Total = 54,729-bp Differences = 5,819 = 10.6%

|             |         |         |   |          |             |        |        |          |                 |               |      |
|-------------|---------|---------|---|----------|-------------|--------|--------|----------|-----------------|---------------|------|
| ORF-CNterm  | Nil     | Nil     | F |          | 00001-00927 | (927)  | (309)  | HM568531 | Novel           | 051276-052228 | 5.8  |
| ORF-CCterm  | Nil     | Nil     | F |          | 00001-00936 | (936)  | (312)  | HM568530 | -               | 053368-054300 | 2.7  |
| U4          | Nil     | Nil     | F |          | 00001-00815 | (815)  | (235)  | HM568532 | $\beta$         | 055558-056372 | 0.4  |
| U5/ORF-B    | Nil     | Nil     | F |          | 00001-00971 | (971)  | (324)  | HM568533 | $\beta$         | 057008-058094 | 0.9  |
| ORF-A       | Nil     | Nil     | F |          | 00001-01087 | (1087) | (329)  | HM568534 | Novel           | 059339-060309 | 0.46 |
| U41         | UL57    | UL29    | F | MDBP     | 00001-01952 | (1952) | (750)  | HM568535 | Core            | 069422-071373 | 0.36 |
| U39         | UL55    | UL27    | F | gB       | 00001-02511 | (2511) | (836)  | HM568536 | Core            | 073986-078862 | 14   |
| U38         | UL54    | UL30    | F | POL      | 02544-04847 | (2304) | (768)  |          | Core            |               |      |
| U33         | UL49    | Nil     | F | Cys-rich | 00001-00905 | (905)  | (302)  | JN983085 | $\beta/\gamma$  | 083522-084426 | 0.55 |
| U31         | UL48    | UL36    | R | TEG-L    | 00943-00001 | (943)  | (314)  | JN983086 | Core            | 086587-087529 | 4.1  |
| U29         | UL46    | UL38    | F | TRI1     | 00001-00667 | (667)  | (222)  | HM568538 | Core            | 096645-110024 | 11   |
| U28         | UL45    | UL39    | F | RRA      | 00714-03116 | 2402   | 801    |          | Core            |               |      |
| U27.5/ORF-H | Nil     | UL40    | F | RRB      | 03160-04065 | 906    | 302    |          | $\alpha/\gamma$ |               |      |
| U27/ORF-I   | UL44    | UL4     | F | PPF      | 04311-05537 | 1224   | 408    |          | Core            |               |      |
| U45.7/ORF-J | Nil     | Nil     | F |          | 05621-06076 | 455    | 152    |          | Novel           |               |      |
| U46         | U73     | UL49A   | F | gN       | 06063-06344 | 282    | 83     |          | Core            |               |      |
| U47/ORF-D   | U74     | Nil     | R | gO       | 07034-06393 | 642    | 213    |          | $\beta$         |               |      |
| U48         | U75     | UL22    | R | gH       | 09226-07013 | 2213   | 737    |          | Core            |               |      |
| U48.5/ORF-E | Nil     | UL23    | R | TK       | 10232-09162 | 1069   | 356    |          | $\alpha/\gamma$ |               |      |
| U49         | UL76    | UL24    | F |          | 10231-10929 | 697    | 232    |          | Core            |               |      |
| U50         | UL77    | UL25    | F | PAC2     | 10748-12487 | 1739   | 579    |          | Core            |               |      |
| U51         | UL78    | Nil     | F | vGPCR1   | 12494-13576 | (1083) | (361)  |          | $\beta$         |               |      |
| U57         | UL86    | UL19    | R | MCP      | 03855-00001 | (3855) | (1285) | HM568539 | Core            | 115602-119689 | 2.9  |
| U58         | UL87    | Nil     | F |          | 04012-04083 | (72)   | (24)   |          | $\beta/\gamma$  |               |      |
| U60ex3      | UL89    | UL15    | R | TERex3   | 00560-00001 | (560)  | (187)  | JN983088 | Core            | 123624-125299 | 1.9  |
| U62         | UL91    | Nil     | F |          | 00587-00853 | 266    | 89     |          | $\beta/\gamma$  |               |      |
| U63         | UL92    | Nil     | F |          | 00801-01394 | 594    | 197    |          | $\beta/\gamma$  |               |      |
| U64         | UL93    | UL17    | F | PAC1     | 01375-01676 | (302)  | (101)  |          | Core            |               |      |
| -           | -       | -       | - | -        | 00001-00016 | (16)   | -      | HM568540 | -               | 127332-128180 | 3.8  |
| U66ex2      | Nil     | Nil     | R | TERex2   | 00136-00017 | (119)  | (40)   |          | -               |               |      |
| U66ex1      | U189ex1 | UL15ex1 | R | TERex1   | 00843-00215 | (628)  | (209)  |          | -               |               |      |

|                 |       |      |   |          |             |        |       |          |       |               |      |
|-----------------|-------|------|---|----------|-------------|--------|-------|----------|-------|---------------|------|
| U70             | UL98  | UL12 | F | EXO      | 00001-00240 | (240)  | (78)  | HM568541 | Core  | 132780-135409 | 4.3  |
| U71             | UL99  | UL11 | F | myrTeg.  | 00177-00464 | 287    | 95    |          | Core  |               |      |
| U72             | UL100 | UL10 | R | gM       | 01617-00535 | 1083   | 359   |          | Core  |               |      |
| U73/ORF-G       | Nil   | UL09 | F | OBP      | 01616-02625 | (1010) | (337) |          | α/γ   |               |      |
| U76             | UL104 | UL06 | R | POR      | 01286-00001 | (1286) | (428) | HM568542 | Core  | 140010-141923 | 2.2  |
| U77             | UL105 | UL05 | F | HEL      | 01237-01914 | (677)  | (225) |          | Core  |               |      |
| U77             | UL105 | UL05 | F | HEL      | 00001-00265 | (265)  | (88)  | JX011082 | Novel | 143402-159076 | 20.7 |
| U77.5/ORF-M     | Nil   | Nil  | F | Nuclear  | 00587-02059 | 1473   | 490   |          | Novel |               |      |
| U80.5/ORF-N     | Nil   | Nil  |   | (absent) |             |        |       |          |       |               |      |
| U81             | UL114 | UL02 | R | UDG      | 03337-02390 | 948    | 314   |          | Core  |               |      |
| U82             | UL115 | UL01 | R | gL       | 04202-03303 | 900    | 299   |          | Core  |               |      |
| U82.5/ORF-Oex1  | Nil   | Nil  | R | S/TGlyP  | 04608-04054 | (554)  | (183) |          | Novel |               |      |
| U82.5/ORF-Oex2  | Nil   | Nil  | R | S/TGlyp  | 04908-04700 | (208)  | (63)  |          | Novel |               |      |
| U82.5/ORF-Oex1  | Nil   | Nil  | R | S/TGlyp  | 05330-04988 | (343)  | (114) |          | Novel |               |      |
| U83.5/ORF-Pex2  | Nil   | Nil  | R | S/TGlyp  | 06644-05419 | (1225) | (407) |          | Novel |               |      |
| U83.5/ORF-Pex1  | Nil   | Nil  | R | S/TGlyp  | 06962-06716 | (246)  | (82)  |          | Novel |               |      |
| U84.5/ORF-Qex2  | Nil   | Nil  | R | Glyp     | 07701-07064 | (635)  | (210) |          | Novel |               |      |
| U84.5/ORF-Qex1  | Nil   | Nil  | R | Glyp     | 08024-07778 | (246)  | (82)  |          | Novel |               |      |
| U85.5/ORF-Kex3  | Nil   | Nil  | R | SplGlyP  | 10302-08137 | (2178) | (725) |          | Novel |               |      |
| U85.5/ORF-Kex2  | Nil   | Nil  | R | SplGlyP  | 10419-10381 | (39)   | (13)  |          | Novel |               |      |
| U85.5/ORF-Kex1A | Nil   | Nil  | R | SplGlyP  | 10490-10467 | (24)   | (8)   |          | Novel |               |      |
| U86.5/ORF-L     | Nil   | Nil  | R | IE-like  | 15157-11234 | 3924   | 1307  |          | Novel |               |      |
| -               | -     | -    | - | -        | 15158-15247 | (80)   | -     |          | -     |               |      |

5. EEHV1B [#NAP19,Haji]: Seventeen segments, ORF-C to ORF-A(5x), Ori-Lyt, MDBP, gB-POL, U33, TEG-L, TRI1-vGPCR, MCP, TERex3-PAC, TERex1,2, EXO-OBP, POR-HEL, HEL to ORF-L.

Total = 53,752-bp Differences = 5,677-bp = 10.6%

|             |      |         |   |          |             |        |       |          |       |               |      |
|-------------|------|---------|---|----------|-------------|--------|-------|----------|-------|---------------|------|
| ORF-CNterm  | Nil  | Nil     | F |          | 00001-00927 | (927)  | (309) | HM568544 | Novel | 051276-052229 | 5.6  |
| ORF-CCterm  | Nil  | Nil     | F |          | 00001-00930 | (930)  | (310) | HM568543 | -     | 053368-054300 | 3.0  |
| U4          | Nil  | Nil     | F |          | 00001-00809 | (809)  | (270) | HM568545 | β     | 055561-056364 | 0.5  |
| U5/ORF-B    | Nil  | Nil     | F |          | 00001-01094 | (1094) | (365) | HM568546 | β     | 057008-058101 | 0.6  |
| ORF-A       | Nil  | Nil     | F |          | 00001-00971 | (971)  | (324) | HM568547 | Novel | 059339-060309 | 0.1  |
| U42         | UL69 | UL54    | F | MTA      | 00001-00069 | (69)   | (23)  | HM568548 | Core  | 067831-068471 | 0.9  |
| Intergenic  | Nil  | Ori-Lyt |   | Ori-Lyt  | 00155-00346 | 192    | NC    |          | -     |               |      |
| U41         | UL57 | UL29    | F | MDB      | 00618-00643 | (26)   | (9)   |          | -     |               |      |
| U41         | UL57 | UL29    | F | MDBP     | 00001-01946 | (1946) | (748) | HM568549 | Core  | 069428-071373 | 0.36 |
| -           |      |         |   |          | 00001-00036 | (36)   | NC    | HM568550 | -     | 073959-079875 | 12   |
| U39         | UL55 | UL27    | F | gB       | 00037-02538 | 2538   | 845   |          | Core  |               |      |
| U38         | UL54 | UL30    | F | POL      | 02571-05696 | 3126   | 1031  |          | Core  |               |      |
| -           |      |         |   |          | 05697-05889 | (198)  | NC    |          | -     |               |      |
| U33         | UL49 | Nil     | F | Cys-rich | 00001-00909 | (909)  | (303) | JN983089 | β/γ   | 083537-084444 | 0.7  |
| U31         | UL48 | UL36    | R | TEG-L    | 00925-00001 | (925)  | (308) | JN983090 | Core  | 086587-087509 | 3.9  |
| U29         | UL46 | UL38    | F | TRI1     | 00001-00666 | (666)  | (222) | HM568552 | Core  | 096646-110232 | 10.9 |
| U28         | UL45 | UL39    | F | RRA      | 00713-03115 | 2402   | 801   |          | Core  |               |      |
| U27.5/ORF-H | Nil  | UL40    | F | RRB      | 03159-04064 | 915    | 305   |          | α/γ   |               |      |
| U27/ORF-I   | UL44 | UL42    | F | PPF      | 04310-05536 | 1226   | 409   |          | Core  |               |      |
| U45.7/ORF-J | Nil  | Nil     | F |          | 05620-06075 | 455    | 152   |          | Novel |               |      |
| U46         | UL73 | UL49A   | F | gN       | 06062-06343 | 282    | 93    |          | Core  |               |      |
| U47/ORF-D   | UL74 | Nil     | R | gO       | 07033-06392 | 642    | 214   |          | β     |               |      |
| U48         | UL75 | UL22    | R | gH       | 09225-07012 | 2213   | 738   |          | Core  |               |      |



|                |         |         |   |          |             |        |       |          |                  |               |     |
|----------------|---------|---------|---|----------|-------------|--------|-------|----------|------------------|---------------|-----|
| U51            | Nil     | Nil     | F | vGPCR1   | 00001-00897 | (897)  | (299) | JN633913 | Novel            | 109375-110259 | 3.8 |
| U60ex3         | UL89ex2 | UL15ex2 | R | TERex3   | 00560-00001 | (560)  | (187) | KM087799 | Core             | 123624-125300 | 1.8 |
| U62            | UL91    | Nil     | F |          | 00587-00853 | 267    | 88    |          | $\beta/\gamma$   |               |     |
| U63            | UL92    | Nil     | F |          | 00801-01394 | 594    | 197   |          | $\beta/\gamma$   |               |     |
| U64            | UL93    | UL17    | F | PAC1     | 01375-01676 | (301)  | (100) |          | Core             |               |     |
| U71            | UL99    |         | F | MyrTeg   | 00001-00271 | (271)  | (89)  | JN633871 | Core             | 132971-133618 | 6.5 |
| U72            | UL100   |         | R | gM       | 00642-00343 | (300)  | (99)  |          | Core             |               |     |
| U73/ORF-G      | Nil     | UL09    | F | OBP      | 00001-00775 | (775)  | (258) | KM087800 | $\alpha/\beta 2$ | 134644-135418 | 2.9 |
| U76            | UL104   | UL06    | R | POR      | 01286-00001 | (1286) | (328) | JN633896 | Core             | 140010-141870 | 2.1 |
| U77            | UL105   | UL05    | F | HEL      | 01237-01861 | (624)  | (208) |          | Core             |               |     |
| U77.5/ORF-M    | Nil     | Nil     | F |          | 00001-00050 | (50)   | (18)  | KM087801 | Core             | 145630-152165 | 41  |
| U80.5/ORF-N    | Nil     | Nil     |   | (absent) |             |        |       |          |                  |               |     |
| U81            | UL114   | UL02    | R | UDG      | 01341-00394 | 948    | 315   |          | Core             |               |     |
| U82            | UL115   | UL01    | R | gL       | 02206-01307 | 900    | 299   |          | Core             |               |     |
| U82.5/ORF-Oex3 | Nil     | Nil     | R | S/TGlyP  | 02613-02058 | (543)  | (180) |          | Novel            |               |     |
| U82.5/ORF-Oex2 | Nil     | Nil     | R | S/TGlyP  | 02912-02705 | (210)  | (70)  |          | Novel            |               |     |
| U82.5/ORF-Oex1 | Nil     | Nil     | R | S/TGlyP  | 03334-02992 | (342)  | (114) |          | Novel            |               |     |
| U83.5/ORF-Pex2 | Nil     | Nil     | R | S/TGlyP  | 04651-03423 | (1224) | (307) |          | Novel            |               |     |
| U83.5/ORF-Pex1 | Nil     | Nil     | R | S/TGlyP  | 04969-04723 | (246)  | (82)  |          | Novel            |               |     |
| U84.5/ORF-Qex2 | Nil     | Nil     | R | GlyP     | 05705-05071 | (637)  | (212) |          | Novel            |               |     |
| U84.5/ORF-Qex1 | Nil     | Nil     | R | GlyP     | 06028-05782 | (246)  | (82)  |          | Novel            |               |     |
| U85.5/ORF-Kex3 | Nil     | Nil     | R | SplGlyP  | 06332-06141 | (191)  | (63)  |          | Novel            |               |     |

7. EEHV1B (#NAP45TW, Shanti2): Nine segments gB-POL, RRA-RRB, PPF to gN, gH to U49, vGPCR1, MyrTeg-gM, OBP, POR-HEL & UDG to ORF-L. Total = 26,649 Differences = 3,986-bp = 15%

|                |       |       |   |         |             |        |       |          |                  |               |      |
|----------------|-------|-------|---|---------|-------------|--------|-------|----------|------------------|---------------|------|
| U39            | UL55  | UL27  | F | gB      | 00001-02538 | 2538   | 845   | KM087802 | Core             | 073959-078887 | 14   |
| U38            | UL54  | UL30  | F | POL     | 02571-04899 | (2361) | (787) |          | Core             |               |      |
| U28            | UL45  | UL39  | F | RRA     | 00001-00510 | (510)  | (169) | KM087803 | Core             | 099251-100623 | 0.4  |
| U27.5/ORF-H    | Nil   | UL40  | F | RRB     | 00554-01373 | (819)  | (273) |          | $\alpha/\gamma$  |               |      |
| U27/ORF-I      | UL44  | UL42  | - | PPF     | 00001-00054 | (54)   | (15)  | KM087804 | Core             | 102133-103021 | 25   |
| U45.7/ORF-J    | Nil   | Nil   | F |         | 00138-00593 | 456    | 151   |          | Novel            |               |      |
| U46            | UL73  | UL49A | F | gN      | 00580-00833 | (833)  | (277) |          | Core             |               |      |
| U48            | UL75  | UL22  | R | gH      | 00541-00001 | (541)  | (180) | KM087805 | Core             | 105359-107067 | 18   |
| U48.5          | Nil   | UL23  | R | TK      | 01544-00477 | 1068   | 355   |          | Core             |               |      |
| U49            | UL76  | UL24  | F |         | 01546-01703 | (157)  | (52)  |          | Core             |               |      |
| U51            | Nil   | Nil   | F | vGPCR1  | 00001-00897 | (897)  | (299) | JN633921 | Novel            | 109375-110259 | 3.8  |
| U57            | UL86  | UL19  | R | MCP     | 02741-00001 | (2741) | (914) | KM087806 | Core             | 115602-118342 | 3.6  |
| U71            | UL99  |       | F | MyrTeg  | 00001-00271 | (271)  | (89)  | JN633879 | Core             | 132971-133618 | 6.5  |
| U72            | UL100 |       | R | gM      | 00642-00343 | (300)  | (99)  |          | Core             |               |      |
| U73/ORF-G      | Nil   | UL09  | F | OBP     | 00001-00804 | (804)  | (268) | KM087807 | $\alpha/\beta 2$ | 134630-135433 | 3.1  |
| U76            | UL104 | UL06  | R | POR     | 00389-00001 | (389)  | (129) | JN633906 | Core             | 140907-141870 | 2.1  |
| U77            | UL105 | UL05  | F | HEL     | 00340-00964 | (625)  | (207) |          | Core             |               |      |
| U81            | UL114 | UL02  | R | UDG     | 00888-00001 | (888)  | (296) | KC854712 | Core             | 146090-159076 | 19.9 |
| U82            | UL115 | UL01  | R | gL      | 01753-00854 | 900    | 299   |          | Core             |               |      |
| U82.5/ORF-Oex3 | Nil   | Nil   | R | S/TGlyP | 02159-01605 | (543)  | (180) |          | Novel            |               |      |
| U82.5/ORF-Oex2 | Nil   | Nil   | R | S/TGlyP | 02459-02251 | (210)  | (70)  |          | Novel            |               |      |
| U82.5/ORF-Oex1 | Nil   | Nil   | R | S/TGlyP | 02881-02539 | (342)  | (114) |          | Novel            |               |      |
| U83.5/ORF-Pex2 | Nil   | Nil   | R | S/TGlyP | 04195-02970 | (1224) | (307) |          | Novel            |               |      |
| U83.5/ORF-Pex1 | Nil   | Nil   | R | S/TGlyP | 04513-04267 | (246)  | (82)  |          | Novel            |               |      |
| U84.5/ORF-Qex2 | Nil   | Nil   | R | GlyP    | 05252-04615 | (637)  | (212) |          | Novel            |               |      |

|                |     |     |   |         |             |        |       |  |       |
|----------------|-----|-----|---|---------|-------------|--------|-------|--|-------|
| U84.5/ORF-Qex1 | Nil | Nil | R | GlyP    | 05572-05329 | (243)  | (81)  |  | Novel |
| U85.5/ORF-Kex3 | Nil | Nil | R | SplGlyP | 07853-05685 | (2168) | (723) |  | Novel |
| U85.5/ORF-Kex2 | Nil | Nil | R | SplGlyP | 07970-07932 | (39)   | (13)  |  | Novel |
| U85.5/ORF-Kex1 | Nil | Nil | R | plGlyP  | 08041-08018 | (23)   | (8)   |  | Novel |
| U86.5/ORF-L    | Nil | Nil | R | IE-like | 12703-08780 | 3924   | 1307  |  | Novel |
| -              |     |     |   |         | 12704-12793 | (89)   | NC    |  | -     |

8. EEHV2 [#NAP12,Kijana]: Eight segments, gB-POL, U34, U33 to TEG-L, TEG-S to PAC2, vGPCR1, U56-MCP, TERex3 to PAC1, U65 to ORF-L. Total = 59,164 = bp Differences = 18,011-bp = 30.4%

|                |         |         |   |          |             |        |        |          |                 |               |      |
|----------------|---------|---------|---|----------|-------------|--------|--------|----------|-----------------|---------------|------|
| -              | -       | -       |   |          | 00001-00024 | (24)   | NC     | HM568558 | -               | 073935-079088 | 27   |
| U39            | UL55    | UL27    | F | gB       | 00025-02571 | 2557   | 848    |          | Core            |               |      |
| U38            | UL54    | UL30    | F | POL      | 02597-05109 | (2513) | (837)  |          | Core            |               |      |
| U34            | UL50    | UL34    | F | DOC      | 00001-00713 | (713)  | (238)  | KC854740 | Core            | 082333-083053 | 25   |
| U33            | UL49    | Nil     | F | Cys-rich | 00001-01222 | (1222) | (407)  | HM568559 | $\beta/\gamma$  | 083509-087991 | (32) |
| U32            | UL48A   | UL35    | F | SCP      | 01110-01373 | 264    | 88     |          | Core            |               |      |
| U31            | UL48    | UL36    | R | TEG-L    | 04451-01378 | (2040) | (680)  |          | Core            |               |      |
| U30            | UL47    | UL37    | R | TEG-S    | 01635-00001 | (1635) | (545)  | HM568561 | Core            | 094802-108190 | 31   |
| U29            | UL46    | UL38    | F | TRI1     | 01625-02515 | 890    | (283)  |          | Core            |               |      |
| U28            | UL45    | UL39    | F | RRA      | 02564-04963 | 2400   | 799    |          | Core            |               |      |
| U27.5/ORF-H    | Nil     | UL40    | F | RRB      | 04982-05887 | 906    | 301    |          | $\alpha/\gamma$ |               |      |
| U27/ORF-I      | UL44    | UL42    | F | PPF      | 06137-07363 | 1227   | 408    |          | Core            |               |      |
| U45.7/ORF-J    | Nil     | Nil     | F |          | 07451-07969 | 419    | 172    |          | Novel           |               |      |
| U46            | UL73    | UL49A   | F | gN       | 07947-08228 | 282    | 93     |          | Core            |               |      |
| U47/ORF-D      | UL74    | Nil     | R | gO       | 08904-08263 | 642    | 215    |          | $\beta$         |               |      |
| U48            | UL75    | UL22    | R | gH       | 11114-08883 | 2232   | 743    |          | Core            |               |      |
| U48.5/ORF-E    | Nil     | UL23    | R | TK       | 12154-11111 | 1044   | 349    |          | $\alpha/\gamma$ |               |      |
| U49            | UL76    | UL24    | F |          | 12156-12854 | 699    | 232    |          | Core            |               |      |
| U50            | UL77    | UL25    | F | PAC2     | 12673-13454 | (782)  | (281)  |          | Core            |               |      |
| U51            | UL78    | Nil     | F | vGPCR1   | 00001-01048 | (1048) | (350)  | KC854713 | $\beta$         | 109209-110248 | (28) |
| U56            | UL85    | UL18    | R | TRI2     | 00283-00001 | (283)  | (94)   | HM568562 | Core            | 115085-118881 | (23) |
| U57            | UL86    | UL19    | R | MCP      | 03818-00344 | (3475) | (1158) |          | Core            |               |      |
| U60ex3         | UL89ex2 | UL15ex2 | R | TERex3   | 00625-00001 | (626)  | (164)  | HM568563 | Core            | 123559-125283 | (24) |
| U62            | UL91    | Nil     | F |          | 00647-00915 | 270    | 89     |          | $\beta/\gamma$  |               |      |
| U63            | UL92    | Nil     | F | tegument | 00863-01456 | 594    | 197    |          | $\beta/\gamma$  |               |      |
| U64            | UL93    | UL17    | F | PAC1     | 01437-01721 | (288)  | (95)   |          | Core            |               |      |
| U65            | UL94    | UL16    | F |          | 00001-00171 | (171)  | (56)   | HM568564 | Core            | 127164-156871 | 31.8 |
| U66ex2         | Nil     | Nil     | R | TERex2   | 00318-00195 | (124)  | (41)   |          | -               |               |      |
| U66ex1         | UL89ex1 | UL15ex1 | R | TERex1   | 01149-00415 | (734)  | (245)  |          | -               |               |      |
| U67            | UL95    | Nil     | F |          | 01249-02337 | 1088   | 363    |          | $\beta/\gamma$  |               |      |
| U68            | UL96    | UL14    | F | tegument | 02355-02702 | 347    | 115    |          | Core            |               |      |
| U69            | UL97    | UL13    | F | CPK      | 02793-04331 | 1538   | 512    |          | Core            |               |      |
| U70            | UL98    | UL12    | F | EXO      | 04415-05875 | 1460   | 486    |          | Core            |               |      |
| U71            | UL99    | UL11    | F | myrTeg   | 05812-06120 | 308    | 102    |          | Core            |               |      |
| U72            | UL100   | UL10    | R | gM       | 07324-06227 | 1095   | 365    |          | Core            |               |      |
| U73/ORF-G      | Nil     | ULO9    | F | OBP      | 07323-09749 | 2427   | 808    |          | $\alpha/\beta2$ |               |      |
| U74            | UL101/2 | UL08    | F | PAF      | 09785-11830 | 2055   | 681    |          | Core            |               |      |
| U75            | UL103   | UL07    | R | tegument | 12505-11813 | 693    | 230    |          | Core            |               |      |
| U76            | UL104   | UL06    | R | POR      | 14183-12414 | 1770   | 589    |          | Core            |               |      |
| U77            | UL105   | UL05    | F | HEL      | 14137-16554 | 2418   | 805    |          | Core            |               |      |
| U77.5/ORF-M    | Nil     | Nil     | F | Nuclear  | 16894-18327 | 1458   | 485    |          | Novel           |               |      |
| U80.5/ORF-N    | Nil     | Nil     | R | vCXCL1   | 18755-18432 | 323    | 107    |          | Novel           |               |      |
| U81            | UL114   | UL02    | R | UDG      | 19728-18778 | 951    | 316    |          | Core            |               |      |
| U82            | UL115   | UL01    | R | gL       | 20533-19694 | 840    | 279    |          | Core            |               |      |
| U82.5/ORF-Oex3 | Nil     | Nil     | R | S/TGlyP  | 21005-20457 | (548)  | (182)  |          | Novel           |               |      |
| U82.5/ORF-Oex2 | Nil     | Nil     | R | S/TGlyP  | 21294-21098 | (196)  | (65)   |          | Novel           |               |      |
| U82.5/ORF-Oex1 | Nil     | Nil     | R | S/TGlyP  | 22172-21371 | (801)  | (267)  |          | Novel           |               |      |
| U83.5/ORF-Pex2 | Nil     | Nil     | R | S/TGlyP  | 23611-22218 | (1394) | (464)  |          | Novel           |               |      |



|                |     |     |           |             |        |       |       |
|----------------|-----|-----|-----------|-------------|--------|-------|-------|
| U83.5/ORF-Pex1 | Nil | Nil | R S/TGlyP | 23951-23693 | (259)  | (86)  | Novel |
| U84.5/ORF-Q    | Nil | Nil | (absent)  |             |        |       |       |
| U85.5/ORF-Kex3 | Nil | Nil | R SplGlyP | 26185-24208 | (1977) | (658) | Novel |
| U85.5/ORF-Kex2 | Nil | Nil | R SplGlyP | 26311-26273 | (39)   | (13)  | Novel |
| U85.5/ORF-Kex1 | Nil | Nil | R SplGlyP | 26483-26379 | (51)   | (17)  | Novel |
| U86.5/ORF-L    | Nil | Nil | R IE-like | 28850-27099 | (1749) | (582) | Novel |

Core = common to all herpesvirus subfamilies;  $\alpha/\beta$  = Alpha & Beta only;  $\beta/\gamma$  = Beta & Gamma only;  $\beta$  = Beta only;  $\alpha/\beta 2$  = Alpha & Roseoloviruses only; Novel = not found in any other herpesviruses. Diff % = level of nucleotide divergence for each locus compared to EEHV1A(Kimba).

## **Supplemental Material: Section 2: Listings of PCR Primers Used for Amplifying and Sequencing**

### **Selected PCR Loci:**

Initial sets of two-step moderately-redundant PAN-Herpesvirus DNA PCR primers for small segments of either the U38(POL) Codehops or U66(TERex3) gene loci of EEHV1 and EEHV2, as well as the PAN EEHV and EEHV1, EEHV2, EEHV3, EEHV4, EEHV5 and EEHV6-specific diagnostic POL or TER locus primers have all been described previously elsewhere (4, 9, 10). Standard basic primer sets for the EEHV1 specific 525-bp U38(POL), 679-bp U71-72(gM), 986-bp U76(POR)-U77(HEL) and 910-bp U51(vGPCR1) gene loci were listed in Stanton et al (19) and for the 1080-bp U47.5(TK)-U489(gH) locus in Zachariah et al (11).

Selected additional specific or consensus primer sets that were designed for and found effective for amplification of key gene segments that are referred to in detail in the text are listed below. Detailed information about numerous other primers not listed that were used for primer PCR, cycle sequencing and phage lambda genome walking procedures can be obtained from the corresponding author.

### **EEHV1A,1B Consensus U39(gB) N-Terminal Locus:**

- R1 LGH3830 5'- CCCTGGTTTTAAAGACTGATAA-3'
- R2 LGH3832 5'- GCCACGGGGGTTTAATCCTTAT -3'
- L1 LGH3837 5'- CCAGAACATATACGATAAGGCCA -3'

First round PCR R1-L1 = 1.5-kb; second round PCR R1-L2 = 1.4-kb.

EEHV2-Specific U38(POL) Codehops Region Locus:

R1 LGH6525 5'-CACATCGATACGGAATCTCT-3'  
R2 LGH7450 5'-CTCTACATTTACCGTACACTC-3'  
L4 LGH7440 5'-GACTTCGCCAGCTTGTATACC-3'  
L3 LGH7437 5'-GTATCATACAAGCTTATAACC-3'  
L2 LGH7439 5'-CGTGTAATGCCGTATACGGATTC-3'  
L1 LGH6524 5'-GTGTCTGGCTATAGCAGAGT-3'

First round PCR R1-L1 = 510-bp; second-round L1-R2 = 480-bp; alternative second round L2-R1 = 480-bp; third-round R2-L2 = 460-bp, third-round first alternative L1 or L2-R3 = 210-bp; third-round second alternative, R1 or R2-L4 = 180-bp.

EEHV1A,1B Specific U41(MDBP) Locus:

R1 LGH6658 5'-CTGGATTTTTACTCGTGGCC-3'  
R2 LGH6657 5'-GGCAACAGAAAAAGGAACCGTG-3'  
R3 LGH6660 5'-CATTTTCAGAGCGTGTACCRG-3'  
L3 LGH6661 5'-CTGTACACGCTCTGAAAATG-3'  
L2 LGH6662 5'-TAGTCTCTGGTCTCACGTCT-3'  
L1 LGH6664 5'-CCTCATAAAGTTGTAGTCGC-3'

First round PCR LHS-1 R1-L2 = 1400-bp; first round RHS-1 R2-L1 = 1470-bp; second round LHS-2 R1-L3 = 1090-bp; second round RHS-2 R3-L1 = 940-bp; alternative second round LHS/RHS-2 R2-L2 = 1050-bp.

EEHV1A Specific Ori-Lyt Locus:

Consensus EEHV1A/1B non-redundant primers:

R1 LGH7425 5'-CGAAGCGCAACACGCGATG-3'

L1 LGH7426 5'-CGTATGATCATTCGGAGTCG-3'

First round PCR R1/L1 = 700-bp.

EEHV1A,1B,2 Redundant Short U28(RRA)-U27.5(RRB) Overlap Locus:

R1 LGH7541 5'-CARTTYAT[A/C/T]GCNCTNATGCCNAC-3' [EEHV1A,1B,2]

R2 LGH7540 5'-CCNTTYGTNGAYCANAGNCARTC-3' [EEHV1A,1B,2]

R3 LGH7801 5'-GCGT[A/T]TCCGAAGC[C/A]TTYTATCC-3' [EEHV1A,1B,2]

L3 LGH7800 5'-TCATCCAATAAGACCACGTGC-3' [EEHV1A,1B only]

L2 LGH7539 5'-ATNCTNAGRTARTACATNCCNGT-3' [EEHV1A,1B,2]

L1 LGH7538 5'-TTNACNAGRTGYTCNGCCATNCC-3' [EEHV1A,1B,2]

First round PCR L1-R1 = 780-bp; second round LHS L1-R2 = 480-bp; second round RHS L2-R1 = 400-bp; alternative second round LHS L1-R3 = 760-bp; alternative second round RHS L3-R1 = 760-bp; third round LHS L3-R3 = 740-bp; alternative third round LHS L3-R2 = 460-bp; alternative third round RHS L2-R3 = 380-bp.

EEHV1A,1B,2 Consensus Long U28(RRA)-U27.5(RRB) Overlap Locus:

R1 LGH8535 5'-TCCGAGGAGGAGAGYTG YCCGTCTCTC-3'

R2 LGH8536 5'-GAGATAGTRCACCACGCY AACGATTC-3'

R3 LGH8564 5'-TATCTGAGYAATATAGATTGGGAAGTG-3'

L7 LGH8537 5'-AG[A/T]CACTTCCCAATCTATATTRCTCAG-3'

L6 LGH8538 5'-GACATRGATTGGCTGTGGTCTACAA-3'

R4 LGH8565B 5'-TTGTRGACCA[C/G]AGCCAATCYATGTC-3'

R5 LGH8566 5'-ATAGGGTTYGACGG[A/T]AC[C/G]ACRGAGGC-3'

R6 LGH8567 5'-GGGATGARAGYAA[A/C]ACACCAC[G/T]GCCG-3'

L5 LGH8568 5'-CGGC[A/C]GTGGTGTG[G/T]ATRCTYTCATCCC-3'

L4 LGH8572 5'-TTTCTATGGGAGAGYGGYAA[A/T]GGACA-3'  
 L3 LGH8569 5'-GGTTTRAC[G/T]CGCTGYACGAT[C/G]ATAGAG-3'  
 L2 LGH8670 5'-TGAAACTGTAGAATCACGTC[A/T]CTCTTCAG-3'  
 L1 LGH8571 5'-CGTCAGC[A/C]AC[A/C]GGTAACATGCTCTCCC-3'

Selected appropriate combinations of the primers listed above in order from right to left were used for this 2.4-kb locus across the overlap of the C-terminus of RRA with the intact RRB ORF encompassing EEHV1A(Kimba) coordinates 98,267 to 101,706 (24).

EEHV1A,1B,2 Consensus Minimally Redundant U45.7(ORF-J)-U46(gN) Overlap Locus:

R1 LGH7530B 5'-CAGA[G/T]GAYGACGATGACTACTGG-3' [EEHV1A,1B,2]  
 R2 LGH7536A 5'-CATGCGATTATATGACAAAGG-3' [EEHV2 only]  
 R2' LGH7536B 5'-CATGTGAYTACATGRCAAAAG-3' [EEHV1A,1B only]  
 R3 LGH7562 5'-GGGCTTCCATCATTGGACTCTAC-3' [EEHV1,1B only]  
 L2 LGH7879 5'-CTATCTATAGATTCCGG[A/T]GGA-3' [EEHV1,6 only]  
 L1 LGH6756B 5'-CAGTTTC[A/C]GTTGTRATGCTYTG-3' [EEHV1A,1B,2]

First round PCR R1-L1 = 880-bp, second round A R1-L2 = 350-bp, second round B1, B2 R2-L1 OR R2'-L1 = 680-bp; alternative second round C R3-L1 = 650-bp

EEHV1A,1B,2 Consensus U48.5(TK) C-terminal Locus.

R1 LGH6764 5'-GCACG[A/G]TACCACGTA CTC-3'  
 R2 LGH4944B 5'- CAGCGTTTCCTCAGAACATCCCTGTAA-3'  
 R3 LGH6737 5'- CATGCCTATC[G/T]GCTATGG-3'  
 L1 LGH4962 5'- CAGATTAGCCTCGAAATATGTAGCGAA-3'

First round PCR R1-L1 = 910-bp; second round R2-L1 = 730-bp; third round R3-L1 = 550-bp.

EEHV2 Specific U51(vGPCR1) Locus:

R1 LGH9323 5'-GTG CTA AAC CTT TTC AAC GAG ACT TC-3'  
R2 LGH9351 5'-GCG TTT AAC GC[A/C] AC[A/G] CAG TTG GT-3'  
L2 LGH9353 5'-CGT AAC AGG TTA GCA TGA GTA TCC TCT TCC-3'  
L1 LGH9325 5'-GAG AAC GCG TTC TGA CTT TCT TCA TCA-3'

First round PCR R1-L1 = 1,100-bp; second round 2A R1-L2 = 990-bp; second round 2B R2-L1 = 1070-bp;  
third round PCR R2-L2 = 960-bp.

EEHV1 Specific Internal U57(MCP) Locus:

R1 LGH4960 5'-GGGTGACACAATGTTCTGAGACAATCT-3'  
R2 LGH4966 5'-GGCTCTTCCAGGTA CT TGAGTAT-3'  
L1 LGH4968 5'-GGTAAGATCTATACTGTCCACGCAT-3'

First round PCR R1-L1 = 1,570-bp; second round R2-L1 = 750-bp.

EEHV1,2 Common U60(TERex3) Extended Locus:

R1 LGH6640 5'-ARTGTTC[A/T]AT[A/T]CCGTATAC-3'  
R2 LGH6671 5'-GTTYGT[A/T]GTAAANGCCGATC'-3'  
L2 LGH6780 5'-GTAACAC[C/G]AGCACRCAGAG-3'  
L1 LGH6672 5'-TGTTGTGCA[G/T]RCACTCTTC-3'

First round PCR R1-L1 = 850-bp; second round A R1-L2 = 450-bp; second round B R2-L1 = 760-bp, third  
round R2-L2 = 390-bp.

EEHV1A,1B,6,2 Specific and Consensus U85.5(ORF-K)-U86.5(ORF-L, MIE-like) Overlap Locus:

The successful primers listed below were designed based on combinations of either common EEHV1 plus  
EEHV2 data or unique EEHV1A data only (as indicated).

R1 LGH9257 5'-CTCACAGACAACGTGTTTCAGAGACAGGC-3' [EEHV1 only]

R2 LGH9084 5'-CC[A/C]TCGCYRCCCARRACCATGGGG-3' [Common]

R3 LGH9085 5'-T[C/G]ACGGTGC[C/G]AGGTCYAYGGGCTC-3' [Common]

L10 LGH9087 5'-GAACRTRAGAGRCTCCTGARACC[G/T]GACC-3' [Common]

R4 LGH9060 5'-ACTCACCTCAGATAGTTT[G/T]GAAAC-3' [Common]

L9 LGH9256 5'-GGGTTCCAATGCTGGCCCAACTTCAAG-3' [EEHV1 only]

L8 LGH9061 5'-GGCTAYCACCATCTTYTGTACCACATGAC-3' [Common]

R5 LGH9039 5'-GTCATGTGGTACARAAGATGGTGRTAGCC-3' [Common]

L7 LGH9258 5'-GTTGGACCACCTAAGGAGATAGAGGAG-3' [EEHV1/6 only]

R6 LGH9041 5'-GAGTCAGAGTCAGAGTCYAGAGTC[A/C]GAGGAGC-3' [Common]

L6 LGH9044 5'-GGAGGCACAGYAGCTCCTC[G/T]TCTTCGAGC-3' [Common]

R7 LGH9065 5'-CTGATGATGTGTTGTCATTAAGAC-3' [EEHV1 only]

L5 LGH9042 5'-GAAGTTCCC[A/C]CTYAAGTGACA[G/T]AATGACA-3' [Common]

R8 LGH9261 5'-CATGTGGACCCCTGGCCCAACCAGACCC-3' [EEHV1 only]

L4 LGH9067 5'-CATAGAGGAGAGGTTTCTGACATTCACCC-3' [EEHV1 only]

R9 LGH9094 5'-CCTCTCTGGATCATGGCCCAAGAGTG-3' [EEHV1 only]

L3 LGH9260 5'-GGACAGACAGGGTGCACAAGTCAGG-3' [EEHV1 only]

L2 LGH9068 5'-CACATGTTTGTAACACAGGCCATGCAC-3' [EEHV1 only]

L1 LGH9069 5'-CATGCTAAGGGGCACACTAGATCACATG-3' [EEHV1 only]

Multiple appropriate combinations were chosen from the list given above arranged in order from right to left across a contiguous 5.8-kb segment at EEHV1A(Kimba) coordinates 153,277 to 159,112. The intact EEHV1A(Kimba) ORF-L protein maps between coordinates 155,062 to 158,985.

**Supplemental Material: Section 3: GenBank Accession Numbers for Reference Non-EEHV Files Used in the Figures.**

Genbank accession numbers used to derive the DNA or protein data for reference non-EEHV genes in the phylogenetic tree dendrograms in **Figs 7, 8 and 9** were as follows: African green monkey cytomegalovirus (AGMCMV) FJ483968; baboon cytomegalovirus (BabCMV) AC090446; alcelaphine (wildebeest) gammaherpesvirus 1 (AIHV1) AF005370; chimpanzee cytomegalovirus or panHV2 (ChCMV) AF480884; equine alphaherpesvirus 1 (EHV1) AY665713; equine alphaherpes 4 (EHV4) AF030027; equine gammaherpesvirus 2 (EqHV2) U20824; guinea-pig cytomegalovirus or CaviidHV2 (GPCMV) KC503762; human cytomegalovirus (HCMV) AY446894; human Epstein-Barr lymphocryptovirus (EBV) AJ507799; human roseolovirus (HHV6A) X83413; human roseolovirus (HHV6B) AF157706; human roseolovirus (HHV7) AF037218; human alphaherpes simplex virus 1 (HSV1) X14112; human alphaherpes simplex virus 2 (HSV2) Z86099; human Kaposi's sarcoma rhadinovirus (KSHV or HHV8) U75698; Marek's disease alphaherpesvirus or GallidHV2 (MDV) AF243438; mouse cytomegalovirus or MuHV1 (MCMV) U68229; mouse gammaherpesvirus 4 or MHV68 (MuHV4) U97553.2; aotine (owl monkey) cytomegalovirus (OMCMV) FJ483970; porcine cytomegalovirus (PigCMV) [POL/gB AF268039; MCP HQ025802 only ones available]; porcine pseudorabies alphaherpesvirus (PRV) BK001744; rat cytomegalovirus or MuHV2 (RCMV) AF2328689; rhesus (macaque) alphaherpesvirus 1 or B-virus (RhBHV1) AF533768; rhesus (macacine) cytomegalovirus (RhCMV) AY186194; rhesus lymphocryptovirus (RhEBV) AY037858; squirrel monkey rhadinovirus, *H. saimiri*, saimiriineHV2 (HVS) X64346; saimiriine (squirrel monkey) cytomegalovirus (SMCMV) FJ483967; tree shrew cytomegalovirus, *H. tupaia*, tupaiid HV1 (TupCMV) AF281817; green turtle alphaherpesvirus (TurtleHV) AF035003; human varicella zoster alphaherpesvirus (VZV) X04370.

**Supplemental Material: Section 4: GenBank Accession Numbers for Individual EEHV DNA Loci and Proteins Used in the SimPlots and Phylogenetic Trees:**

**Figure 2: Panel (a) U39(gB) Proteins:** EEHV1A(#NAP11, Kumari) ADK70785; EEHV1A(#NAP18, Kala) ADK70824; EEHV1(#NAP20, KSB) AEM72533; EEHV1A(#NAP23, Kimba); EEHV1A(#EP22, Raman) AGE10030; EEHV1B(#NAP14, Kiba) ADK70861; EEHV1A(NAP23, Kimba) AEM62537; EEHV1B(#NAP19, Haji) ADK70891; EEHV1B(#NAP33, Jade1) AEM72553; EEHV1B(#NAP45, Shanti2) AIH00838; EEHV1B(#EP18, Emelia) AEM72571; EEHV2(#NAP12, Kijana) ADK70917. The other unnamed NAP# and EP# samples are all listed in Genbank under accession numbers between AEM72525 to AEM72575.

**(b) U38(POL) DNA:** EEHV1A(#NAP11, Kumari) HM568508; EEHV1A(#NAP18, Kala) HM568517; EEHV1(#NAP20, KSB) JF692751; EEHV1A(#NAP23, Kimba) JF692753; EEHV1A(#EP22, Raman ) KC462165; EEHV1B(#NAP14, Kiba-B) HM568536; EEHV1B(#NAP19, Haji) HM568548; EEHV1B(#NAP33, Jade1) JF692761; EEHV1B(#NAP45, Shanti2) AIH00839; EEHV1B(#EP18, Emelia) KC462164; EEHV2(#NAP35) JF682762. The other unnamed NAP# and EP# samples U39(gB)-U38(POL) loci are all listed in Genbank under accession numbers between JF692747 to JF692773.

**(c) U45-7(ORF-J)-U46(gN) DNA:** EEHV1A(#NAP11, Kumari) HM568513; EEHV1A(#NAP18, Kala) HM568525; EEHV1(#NAP20, KSB) KM087786; EEHV1A(#NAP23, Kimba) KC618527; EEHV1A(#EP22, Raman) KC462165; EEHV1B(#NAP14, Kiba) HM568538; EEHV1B(#NAP19, Haji) HM568552; EEHV1B(#NAP33, Jade1) AIH00821; EEHV1B(#NAP45, Shanti2) AIH00843; EEHV1B(#EP18, Emelia) AIH00859; EEHV2(#NAP12, Kijana) HM568561. **(d) U81(gL) Proteins:** EEHV1A(#NAP11, Kumari) JX011081; EEHV1A(#NAP18, Kala) ADK70839; EEHV1A(#NAP23, Kimba) AGG16117; EEHV1A(#EP22, Raman) AGE1072; EEHV1B(#NAP14, Kiba) AIC84223; EEHV1B(#NAP19, Haji) AIC84232; EEHV1B(#NAP33, Jade1) AIH00833; EEHV1B(#NAP45, Shanti2) AIH00854; EEHV1B(#EP18, Emelia) AIH00864; EEHV2(#NAP12, Kijana) AGL61575.



**Figure 7:** (Proteins): **Panel (a): U38(POL)**, DNA polymerase, EEHV1A(#NAP18) ADK70825, EEHV1B(#NAP19) ADK70892, EEHV2(#NAP12) ADK70918, EEHV5(#NAP28) AEW50109, EEHV6(#NAP35) AEM72555; **(b) U39(gB)**, glycoprotein-B, EEHV1A(#NAP18) ADK70824, EEHV1B(#NAP19) ADK70891, EEHV2(#NAP12) ADK70917, EEHV5A(#NAP50) AGK82348, EEHV5B(#NAP58) AFO11059.2, EEHV6(#NAP35) AEM72556.2; **(c) U48(gH)**, glycoprotein-H, EEHV1A(#NAP18) ADK70823, EEHV1A(#NAP11) AET11415, EEHV1B(#NAP19) ADK70899, EEHV1B(#NAP14) ADK70873, EEHV2(#NAP12) ADK70927, 497 aa; **(d) U72(gM)**, glycoprotein-M, EEHV1A(#NAP18) ADK70850, EEHV1B(#NAP19) ADK70913, EEHV2(#NAP12) ADK70943; **(e) U57(MCP)**, major capsid protein, EEHV1A(#NAP18) ADK70841, EEHV1B(#NAP19) ADK70904, EEHV2(#NAP12) ADK70931, EEHV5(#NAP28) AEW50116, EEHV6(#NAP35) AEW50147; **(f) U69(CPK)**, conserved protein kinase, EEHV1A(#NAP11) ADK70807 , EEHV1B(#NAP14, Ehlers) ABG36589, EEHV2(#NAP12) ADK70940.

**Figure 8 (Proteins):** **Panel (a) U48.5(TK)**, thymidine kinase, EEHV1A(#NAP18) ADK70833, EEHV1B(#NAP19) ADK70900, EEHV2(#NAP12) ADK70928, EEHV5A(#NAP50) AEW50127, EEHV6(#NAP35) AEW50144; **(b) U73(OBP)**, origin binding protein, EEHV1A(#NAP18) ADK70849, EEHV1B(#NAP19) ADK70914, EEHV2(#NAP12) ADK70944, EEHV5(#NAP50) AEW50133, EEHV6(#NAP35) AEW50156; **(c) U27.5(RRB)**, ribonucleotide kinase B-subunit, EEHV1A(#NAP18) ADK70827.2, EEHV1B(#NAP19) ADK70894.2, EEHV2(#NAP12) ADK70922 , EEHV5A(#NAP28), EEHV6(#NAP35); **(d) U28(RRA)**, ribonucleotide reductase, A sub-unit, EEHV1A(#NAP18) ADK70826.3, EEHV1B(#NAP19) ADK70893.3 , EEHV2(#NAP12) ADK70921; **(e) U27(PPF)**, polymerase processivity factor, ORF-I; EEHV1A(#NAP18) ADK70828.2, EEHV1B(#NAP19) ADK70895.3, EEHV2(#NAP12) ADK70923; **(f) U51(vGPCR1)**, G-protein coupled receptor-1, EEHV1A(#NAP18) ADK70836, EEHV1B(#NAP19) ADK70903, EEHV2(#NAP12) AGZ17118, EEHV5B(#NAP58) AGZ17136, EEHV6(#NAP35) AEW50146.

**Figure 9:** DNA Loci: **Panel: (a) U38(POL) locus**, DNA polymerase, DPOL, EEHV1A(#NAP18) HM568523, EEHV1B(#NAP19) HM568550, EEHV2(#NAP12) HM568558, EEHV5(#NAP28) JN983100, EEHV6(#NAP35) JF692762; **(b) U39(gB) locus**, glycoprotein B, EEHV1A(#NAP18) HM568523, EEHV1B(#NAP19) HM568550, EEHV2(#NAP12) HM568558, EEHV5A(#NAP50) JN983108, EEHV5B(#NAP58) JX011013, EEHV6(#NAP35) JF692762; **(c) U76(POR)-U77(HEL) locus**, portal plus helicase subunit, EEHV1A(#NAP18) HM568529, EEHV1B(#NAP19) HM568542, EEHV2(#NAP12) HM568564, EEHV5(#NAP50), JN983115 EEHV6(#NAP35) JN983126; **(d) U48(gH) locus**, glycoprotein H, EEHV1A(#NAP18) HM568525, EEHV1B(#NAP19) HM568552, EEHV2(#NAP12) HM568561; **(e) U69(CPK) locus**, conserved protein kinase, EEHV1A(#NAP11) HM568515, EEHV1B(#NAP14, Ehlers), AF322977.2, EEHV2(#NAP12) HM568564, and **(f) U28/RRA locus**, EEHV1A(#NAP18) HM568525, EEHV1B(#NAP19) HM568552, EEHV2(#NAP12) HM568561.
